1 Title Page

2 Plasmidome analysis of carbapenem-resistant Enterobacteriaceae isolated in Vietnam

3 Running title. Plasmidome analysis of CRE in Vietnam

4

5 Aki Hirabayashi<sup>a</sup>, Koji Yahara<sup>a</sup>, Satomi Mitsuhashi<sup>b#</sup>, So Nakagawa<sup>b</sup>, Tadashi Imanishi<sup>b</sup>,

6 Van Thi Thu Ha<sup>c</sup>, An Van Nguyen<sup>c##</sup>, Son Thai Nguyen<sup>c</sup>, Keigo Shibayama<sup>d\*</sup>, and Masato

7 Suzuki<sup>a\*</sup>

8

9 <sup>a</sup>AMR Research Center, National Institute of Infectious Diseases, Tokyo, Japan

10 <sup>b</sup>Department of Molecular Life Science, Tokai University School of Medicine, Kanagawa,

11 Japan

12 <sup>c</sup>Microbiology Department, Hospital 103, Military Medical University, Hanoi, Vietnam

13 <sup>d</sup>Department of Bacteriology II, National Institute of Infectious Diseases, Tokyo, Japan

14

15 \*Corresponding authors. Phone: +81-3-5285-1111, Fax: +81-3-561-1150, E-mail: suzuki-

16 m@nih.go.jp for MS, and Phone: +81-3-5285-1111, Fax: +81-3-561-1150, E-mail:

17 keigo@nih.go.jp for KS.

18

19 <sup>#</sup>Present address. Department of Human Genetics, Yokohama City University

20 Graduate School of Medicine, Kanagawa, Japan

21 <sup>##</sup>Present address. Department of Viral Infection and International Health, Graduate

22 School of Medical Sciences, Kanazawa University, Ishikawa, Japan

23

## Abstract

Carbapenem-resistant Enterobacteriaceae (CRE) represent a serious threat to public health due to limited management of severe infections and high mortality. The rate of resistance of Enterobacteriaceae isolates to major antimicrobials, including carbapenems, is much higher in Vietnam than in Western countries, but the reasons remain unknown due to the lack of genomic epidemiology research. A previous study suggested that carbapenem resistance genes, such as the carbapenemase gene *bla*<sub>NDM-1</sub>, spread via plasmids among Enterobacteriaceae in Vietnam. In this study, we performed detection and molecular characterization of *bla*<sub>NDM-1</sub>-carrying plasmids in CRE isolated in Vietnam, and identified several possible cases of horizontal transfer of plasmids both within and among species of bacteria. Twenty-five carbapenem-resistant isolates from Enterobacteriaceae clinically isolated in a reference medical institution in Hanoi were sequenced on Illumina short-read sequencers, and 12 isolates harboring *bla*<sub>NDM-1</sub> were sequenced on an Oxford Nanopore Technologies long-read sequencer to obtain complete plasmid sequences. Most of the plasmids co-carried genes conferring resistance to clinically relevant antimicrobials, including third-generation cephalosporins, aminoglycosides, and fluoroquinolones, in addition to *bla*<sub>NDM-1</sub>, leading to multidrug resistance of their bacterial hosts. These results provide insight into the genetic basis of CRE in Vietnam, and could help control nosocomial infections.

## Introduction

Carbapenem-resistant Enterobacteriaceae (CRE) represent a serious threat to public health due to limited management of severe infections and high mortality. Carbapenem-hydrolyzing  $\beta$ -lactamase (carbapenemase) genes, such as *bla*<sub>NDM</sub>, *bla*<sub>KPC</sub>, and *bla*<sub>OXA-48</sub>, that confer resistance to a broad range of  $\beta$ -lactams including third-generation cephalosporins and carbapenems are predominantly encoded on conjugative plasmids and have been transferred among Enterobacteriaceae around the world [1]. Therefore, it is very important to detect carbapenemase-carrying plasmids and to aggregate information on the plasmids spreading in each country. According to a report from China [2], CRE isolates simultaneously harbored other important antimicrobial resistance (AMR) genes, including those encoding extended-spectrum  $\beta$ -lactamase (ESBL) that hydrolyze third-generation cephalosporins, plasmid-mediated quinolone resistance, and aminoglycoside resistance genes, suggesting that the isolates harbored plasmids associated with multidrug resistance.

Several studies have revealed the co-existence of clinically relevant AMR genes on the same plasmid. The acquired fluoroquinolone resistance gene *qnr*, which encodes an efflux pump that excretes quinolones, was co-carried with carbapenemase genes in the same plasmids in Taiwan [3], and with *bla*<sub>KPC</sub> in Israel [4]. Aminoglycoside acetyltransferases such as AAC(6')-Ib and 16S ribosomal RNA (rRNA) methyltransferases such as ArmA and RmtB are involved in well-known mechanisms of high-level resistance to aminoglycosides. In Switzerland, 16S rRNA methyltransferase genes have been reported to be co-carried with *bla*<sub>NDM-1</sub>, in the same plasmids [5]. Another acquired fluoroquinolone resistance gene, *qep* [6], which also encodes a

quinolone efflux pump, co-existed with aminoglycoside resistance and ESBL genes in the same plasmids in China [7]. The spread of plasmids co-carrying fluoroquinolone, aminoglycoside, and carbapenem resistance genes both within and among species of bacteria poses a threat to public health. In this study, we report the detailed genetic structures of the plasmids that co-carried *bla*<sub>NDM-1</sub> with other important AMR genes; this knowledge provides insight into characteristics and transmission of the plasmids among Enterobacteriaceae in Vietnam.

The Vietnamese Ministry of Health developed a national action plan on AMR in 2013 [8]. The Viet Nam Resistance (VINARES) project implements measures in the following areas: infection control and healthcare-associated infections (HAI), antimicrobial consumption, and microbiological analysis and reporting capacity [9]. Through VINARES, a surveillance network consisting of 16 central and provincial-level medical institutions was established in 2013. Vietnam has implemented AMR surveillance and stewardship according to the national action plan, and research on AMR using whole-genome sequencing has begun. According to VINARES data, the rate of resistance of *Klebsiella pneumoniae* to third-generation cephalosporins, carbapenems, aminoglycoside, and fluoroquinolones was 66.4%, 17.1%, 29.5%, and 53.0%, respectively, in Vietnam [10], whereas the rate was 11.4%, 0.6%, 7.9%, and 9.3%, respectively, in UK [11], and 17.2, 4.3%, 4.5%, and 16.8%, respectively, in U.S.A [12]. The rate of resistance to major antimicrobials, including carbapenems, is much higher in Vietnam than in Western countries, but the reasons remain unknown due to the lack of genomic epidemiology research. A point prevalence survey with screening for colonization by CRE in 12 medical institutions in Vietnam revealed that 52% of patients were colonized with CRE [13]. Previously, we frequently detected *bla*<sub>NDM</sub> genes in CRE isolated in Vietnam [14], and

suspected that *bla*<sub>NDM</sub> genes were spreading via plasmids among Enterobacteriaceae in medical institutions and communities. To examine the prevalence of important AMR genes in plasmids, whole-genome sequencing of CRE isolates is required. Long-read sequencing is useful for constructing complete sequences of whole plasmids and tracking horizontal transfer of AMR plasmids during nosocomial infections [15]. Recently, long-read nanopore sequencing using MinION from Oxford Nanopore Technologies (ONT) has been applied to such investigations [16,17].

In this study, we performed nanopore sequencing to achieve comprehensive characterization of plasmids carrying *bla*<sub>NDM-1</sub> among clinical isolates of Enterobacteriaceae from Vietnam.

## Results

A total of 122 isolates of ESBL-producing Enterobacteriaceae were collected in daily diagnosis in a reference medical institution in Hanoi, Vietnam between 2013 and 2017. Twenty-five CRE isolates, including 19 *K. pneumoniae*, two *Escherichia coli*, two *Citrobacter freundii*, one *Morganella morganii*, and one *Proteus mirabilis* isolates, were sequenced on Illumina short-read sequencers, and confirmed actually carbapenemase-positive and carrying carbapenemase genes (12 *bla*<sub>NDM-1</sub>, five *bla*<sub>NDM-4</sub>, eight *bla*<sub>KPC-2</sub>, one *bla*<sub>OXA-48</sub>, and one *bla*<sub>OXA-181</sub>). As shown in Fig. 1, many isolates had the same types of carbapenemase genes and plasmid replicons. For example, *M. morganii* MH16-367M, *P. mirabilis* MH13-009N, *C. freundii* MH17-012N, and *E. coli* MH13-051M had the IncN replicon and *bla*<sub>NDM-1</sub>, suggesting that they shared a common plasmid carrying *bla*<sub>NDM-1</sub> that had been transferred via conjugation. Multilocus sequence typing (MLST) classified three *K. pneumoniae* isolates (MH15-289M, MH16-398D, and MH15-258M) as sequence type 11 (ST11), and another three *K. pneumoniae* isolates (MH15-208H, MH15-191M, and MH13-055M) as sequence type 395 (ST395). The isolates that belonged to the same STs had the same replicons and *bla*<sub>NDM-1</sub>, suggesting that they shared a common plasmid carrying *bla*<sub>NDM-1</sub> and had been transferred via conjugation or suggesting that their common origin clonally disseminated. Enterobacteriaceae harboring *bla*<sub>NDM-1</sub> were first reported in Vietnam in 2013 [18], suggesting that *bla*<sub>NDM-1</sub> is both important and prevalent in this country; hence, there is an urgent need to elucidate the mechanism of plasmid transmission. Twelve isolates harboring *bla*<sub>NDM-1</sub> and one isolate harboring *bla*<sub>NDM-4</sub> were sequenced on a MinION nanopore sequencer, yielding complete sequences of the plasmids carrying the gene. The results of BLAST search revealed that some plasmids had high sequence identities with each other and with

plasmids in the GenBank database (Figs. 2, 3, 4, and 5). However, *bla*<sub>NDM-4</sub>-carrying plasmid pMH16-335M\_1 was not identical to any other plasmids (data not shown).

*P. mirabilis* MH13-009N and *M. morganii* MH16-367M had only one plasmid, pMH13-009N\_1 (72.6 kb) and pMH16-367M\_1 (73.1 kb), respectively; the sequences of these plasmids were almost identical, including the *bla*<sub>NDM-1</sub> and IncFII(pSE11)::IncN hybrid replicon regions (Figs. 2A and 2B). Both of the plasmids carried *bla*<sub>NDM-1</sub> and an integron cassette that contains the class 1 integrase gene (*intI1*) and the AMR genes (*bla*<sub>TEM-1b</sub>, *rmtB*, and *qepA1*). The same integron cassette was observed in previous reports [6][19]. In another case, *E. coli* MH13-051M had five plasmids, and *C. freundii* MH17-012N had four plasmids. *E. coli* MH13-051M harbored an IncFII(pRSB107)::IncN hybrid plasmid carrying *bla*<sub>NDM-1</sub>, pMH13-051M\_1 (111.5 kb), which shared common structures with two plasmids, pMH17-012N\_1 (39.2 kb) and pMH17-012N\_2 (87.6 kb), both found in *C. freundii* MH17-012N (Figs. 2C and 2D). The plasmid pMH13-051M\_1 and the smaller IncR plasmid pMH17-012N\_1 carried AMR genes (*bla*<sub>NDM-1</sub> and *bla*<sub>TEM-1b</sub>), and the only pMH13-051M\_1 carried *rmtB* and ESBL gene *bla*<sub>CTX-M-55</sub>. The larger IncFII(pHN7A8)::IncN hybrid plasmid pMH17-012N\_2 carried no known AMR genes, but did have a set of conjugation-associated type IV secretion system (T4SS) genes, which shared common structures with plasmid pMH13-051M\_1.

BLAST search showed that *P. mirabilis* pMH13-009N\_1 was highly identical with *Salmonella enterica* FDAARGOS\_70 plasmid unnamed1 from human in U.S.A. (100.0% identity in 61% region of pMH13-009N\_1), which carried *bla*<sub>TEM-1B</sub> (Fig. 3A). Also, *C. freundii* pMH17-012N\_2 was highly identical with *E. coli* p103-2-4 in China (99.9% identity in 94% region of pMH17-012N\_2) and with *Salmonella enterica* serovar Enteritidis p12367A from human in China (99.9% identity in 73% region of pMH17-

012N\_2) (Fig. 3B). Though the plasmid pMH17-012N\_2 had no AMR gene, the plasmids p103-2-4 and p12367A carried several important AMR genes, such as *rmtB*, *bla*<sub>TEM-1b</sub>, and *bla*<sub>CTX-M-55</sub> (Fig. 3B).

Furthermore, as shown in Fig. 4, three *K. pneumoniae* isolates belonging to ST11 (MH15-289M, MH16-398D, and MH15-258M) shared identical IncFIA(HI1)::IncA/C2 hybrid plasmids carrying *bla*<sub>NDM-1</sub> (147–149 kb), and all of these plasmids carried other important AMR genes, such as *qnrB9*, *rmtC*, *bla*<sub>OXA-1</sub>, and *bla*<sub>CTX-M-15</sub>. BLAST search showed that these three plasmids were highly identical with *K. pneumoniae* plasmid tig00000169\_pilon in U.S.A. (99.8% identity in 82% region of pMH15-289M\_1) and with *E. coli* pK71-77-1-NDM from human in Norway (99.9% identity in 62% region of pMH15-289M\_1). The plasmids tig00000169\_pilon and pK71-77-1-NDM carried *rmtC*, *bla*<sub>NDM-1</sub>, and *bla*<sub>CMY-6</sub>, and the plasmid tig00000169\_pilon further carried *qnrB58* and *bla*<sub>SHV-11</sub>. *K. pneumoniae* MH16-398D had 235 sequence variants (214 single-nucleotide variants [SNVs], 14 multiple-nucleotide variants [MNVs], four deletions, two insertions, and one replacement), and *K. pneumoniae* MH15-258M had six sequence variants (five SNVs and one replacement) relative to *K. pneumoniae* MH15-289M.

As shown in Fig. 5, another three *K. pneumoniae* isolates belonging to ST395 (MH15-208H, MH15-191M, and MH13-055M) shared identical IncFII(Yp) plasmids carrying *bla*<sub>NDM-1</sub> (75–76 kb), and all plasmids carried another important AMR gene, *rmtB*. BLAST search showed that these three plasmids were highly identical with *Enterobacter hormaechei* pNDM1\_045001 from human in China (99.9% identity in 98% region of pMH15-208H\_1) and with *K. pneumoniae* pSECR18-2374C from human in South Korea (99.9% identity in 95% region of pMH15-208H\_1). The plasmid pNDM1\_045001 carried *rmtB*, *bla*<sub>TEM-1b</sub>, and *bla*<sub>NDM-1</sub>, and the plasmid pSECR18-2374C carried *rmtB*, *bla*<sub>TEM-1b</sub>,



and *bla*<sub>NDM-4</sub>. *K. pneumoniae* MH15-191M had three sequence variants (two SNVs and one MNV) and *K. pneumoniae* MH13-055M had only one SNV relative to *K. pneumoniae* MH15-208H.

The *bla*<sub>NDM-1</sub>-carrying plasmids, *P. mirabilis* pMH13-009N\_1 and *M. morganii* pMH16-367M\_1 were successfully transferred to recipient *E. coli* at a frequency of  $10^{-2}$ – $10^{-3}$  *in vitro*, however, *C. freundii* pMH17-012N\_1 and pMH17-012N\_2, *E. coli* pMH13-051M\_1, *K. pneumoniae* pMH15-258M\_1, and *K. pneumoniae* pMH15-208H\_1 were not transferred to recipient *E. coli* under our experimental conditions (data not shown).

## Discussion

In this study, we performed plasmidome analysis (i.e., comprehensive genetic analysis of plasmids) on plasmids carrying carbapenemase genes in CRE isolated from patients in Vietnam. We focused on CRE isolates harboring *bla*<sub>NDM</sub>, one of the most important carbapenemase genes in the world, and completely sequenced 12 plasmids carrying *bla*<sub>NDM-1</sub> from *K. pneumoniae*, *E. coli*, *C. freundii*, *M. morganii*, and *P. mirabilis* isolates and one plasmid carrying *bla*<sub>NDM-4</sub> from *K. pneumoniae* isolate. Some plasmids were nearly identical to each other, suggesting that they represent common and important AMR plasmids disseminated in this country. Moreover, the co-existence of clinically relevant AMR genes, such as ESBL, aminoglycoside resistance, and fluoroquinolone resistance genes, with *bla*<sub>NDM-1</sub> was observed in plasmids pMH13-009N\_1, pMH16-367M\_1, pMH15-289M\_1, pMH16-398D\_1, and pMH15-258M\_1. Hence, the spread of the plasmids both within and among species of bacteria will pose a threat to public health.

Almost identical IncFII(pSE11)::IncN hybrid plasmids, pMH13-009N\_1 and pMH16-367M\_1, were found in *P. mirabilis* and *M. morganii* isolates, respectively (Figs. 2A and 2B). These plasmid shared common structures with the IncN plasmid from *S. enterica* isolate in U.S.A (Fig. 3A). IncN plasmids are prevalent in the microbiota of animals, and disseminate AMR genes such as *bla*<sub>CTX-M-1</sub> and *qnr* [20], suggesting that their origin plasmid could be disseminated in communities, including humans, animals, and the environment, in Vietnam and other countries.

The IncFII(pRSB107)::IncN hybrid plasmid carrying *bla*<sub>NDM-1</sub>, pMH13-051M\_1 in *E. coli* MH13-051M, had partial sequence identity with an IncR plasmid carrying *bla*<sub>NDM-1</sub>, pMH17-012N\_1, and an IncFII(pHN7A8)::IncN hybrid plasmid carrying conjugation genes but no known AMR gene, pMH17-012N\_2, both in *C. freundii* MH17-012N (Figs.

2C and 2D). The plasmid pMH17-012N\_2 shared common structures with the plasmids p103-2-4 from *E. coli* in China and p12367A from *Salmonella enterica* in China, carrying many AMR genes (Fig. 3B). Rearrangement of conjugation genes plays an important role in the dissemination of AMR genes between bacteria [21]. Because known IncR plasmids are non-transferable [22], an IncR plasmid carrying AMR genes, such as pMH17-012N\_1, and another plasmid carrying conjugation genes, such as pMH17-012N\_2, could be assumed to have been fused into a single plasmid with both AMR and conjugation genes, such as pMH13-051M\_1, in a bacterium, and then been propagated by conjugation to another bacterium. Reports of IncR plasmids carrying various AMR genes have been increasing. The pool of AMR genes on IncR plasmids is thought to spread to transmissible plasmids via recombination, contributing to the high evolutionary plasticity of bacterial genomes [23]. IncFII(pRSB107)::IncN hybrid plasmids such as pMH13-051M\_1 are partially homologous to the pHN7A8 plasmid, which carries several AMR genes, such as *bla*<sub>CTX-M-65</sub>, *fosA3*, and *rmtB*, and is widespread in *E. coli* from animals in China [24]. The plasmid pMH13-051M\_1 also carries *bla*<sub>CTX-M-55</sub>, *fosA3*, and *rmtB* in addition to *bla*<sub>NDM-1</sub> and *bla*<sub>TEM-1B</sub>.

The IncFII(pSE11)::IncN, IncFII(pRSB107)::IncN, and IncFII(pHN7A8)::IncN hybrid plasmids shown in Figs. 2A and 2C consisted of two replicons belonging to different incompatibility groups, IncFII and IncN. Similarly, IncFIA(HI1)::IncA/C2 hybrid plasmids from three *K. pneumoniae* ST11 isolates consisted of two replicons belonging to different incompatibility groups, IncFIA and IncA/C2 (Fig. 4). Hybrids of multiple replicons belonging to different incompatibility groups represent a plasmid strategy for expansion of host range and dissemination of important acquired genes, including AMR genes, among bacteria [25]. The plasmid pMH15-289M\_1 was similar in structure to those

reported in U.S.A and Europe, and the plasmid pMH15-208H\_1 was similar in structure to those reported in Asia (Figs. 4 and 5). These *K. pneumoniae* and plasmids would have also been spreading in medical institutions and community in Vietnam.

It is important to estimate whether *K. pneumoniae* isolates belonging to the same STs were originated from the same clones and spread within the medical institution. According to a report [26], SNVs accumulated in *K. pneumoniae* (ST258) at a rate of 3.9 SNVs per year. Our analysis of SNVs of *K. pneumoniae* (ST11) revealed 214 SNVs in MH16-398D relative to MH15-289M; based on the rate of accumulation, it could take many years for these many SNVs to arise. This suggests that many ST11 clones would be prevalent in the medical institutions and communities, and that they have intermixed for a long time. In support of this theory, a report [27] showed that *K. pneumoniae* isolates from medical institutions, sewage, canals, and agricultural waste water were intermixed in the phylogenetic classification. Because ST11 is one of major international epidemic clones of *K. pneumoniae* [28], an ST11 clone carrying this AMR plasmid could have disseminated in a medical institution or local community in Hanoi, Vietnam. Another three isolates of *K. pneumoniae* (ST395) are more clonal because only a few SNVs were present in MH15-191M and MH13-055M relative to MH15-208H.

## Conclusion

Plasmidome analysis in this study enabled estimation of the origins and diversity of plasmids carrying *bla*<sub>NDM-1</sub> in Vietnam. Hybrid analysis with both Illumina short-read and ONT long-read sequencing is a promising method for detecting important AMR plasmids in CRE isolates and controlling nosocomial infections.

## Materials and Methods

### Bacterial isolates

A total of 122 ESBL-producing Enterobacteriaceae isolates were collected from blood, sputum, urine, and pus from patients in daily diagnosis in a reference medical institution in Hanoi, Vietnam between 2013 and 2017. Bacterial species identification and antimicrobial susceptibility testing were performed by Vitek 2 (BioMérieux) and E-test (BioMérieux). Carbapenemase production was examined by CarbaNP test according to the Clinical and Laboratory Standards Institute (CLSI) guidelines. Major carbapenemase genes (*bla<sub>NDM</sub>*, *bla<sub>KPC</sub>*, *bla<sub>OXA-48</sub>*, *bla<sub>IMP</sub>*, and *bla<sub>VIM</sub>*) were detected by a multiplex PCR method [29]. Twenty-five carbapenem-resistant and carbapenemase-positive isolates (19 *K. pneumoniae*, two *E. coli*, two *C. freundii*, one *M. morganii*, and one *P. mirabilis*) were subjected to the whole-genome sequencing analysis described below.

### Whole-genome sequencing and bioinformatics analysis

Whole genome sequencing using MiniSeq, MiSeq, and/or HiSeq systems (Illumina) was performed for phylogenetic and MLST analysis, and detection of acquired AMR genes and plasmid replicon types. A maximum-likelihood phylogenetic tree was generated by PhyML from a concatenated core-gene alignment consisting of 13,305 SNVs constructed using the Roary pipeline (<https://sanger-pathogens.github.io/Roary/>). Sequence types, carbapenemase genes, and plasmid replicon types were analyzed using MLST v2.0, ResFinder v3.2 with minimum threshold of 90% identity and 60% coverage, and PlasmidFinder v2.1 with minimum threshold of 90% identity and 60% coverage, respectively, on the Center for Genomic Epidemiology (CGE) server at Technical University of Denmark (<http://www.genomicepidemiology.org>).

Twelve Enterobacteriaceae isolates with *bla*<sub>NDM-1</sub> (seven *K. pneumoniae*, one *E. coli*, two *C. freundii*, one *M. morganii*, and one *P. mirabilis*) and one *K. pneumoniae* isolate with *bla*<sub>NDM-4</sub> were further sequenced on a MinION nanopore sequencer (Oxford Nanopore Technologies) using the SQK-RAD002 or SQK-RBK001 kits and R9.4 flowcells to obtain complete sequences of plasmids carrying carbapenem resistance genes. *De novo* assembly was performed using Canu v1.5 [30] and Miniasm [31], error correction using Illumina reads with CLC Genomics Workbench v12.0 (QIAGEN), and coding sequences (CDS) annotation using the PATRIC server (<https://www.patricbrc.org>). Sequence variant detection was performed using CLC Genomics Workbench. Linear comparison of sequences was performed using BLAST and visualized by Easyfig (<http://mjsull.github.io/Easyfig/>). *bla*<sub>NDM-1</sub>, other important AMR genes (ARG), type IV secretion system (T4SS)-associated genes involved in conjugation that were detected by SecReT4 program [32], and mobile gene elements (MGE) were identified manually from CDS annotations.

Draft genome and complete plasmid sequences of CRE isolated in Vietnam have been deposited at GenBank/EMBL/DDBJ under BioProject number PRJDB6655.

## Bacterial conjugation

Bacterial conjugation was performed according to the following protocol. The same amount of Luria-Bertani (LB) broth cultures of each donor bacteria and the recipient azide-resistant *E. coli* J53 (*F- met pro Azi<sup>r</sup>*), were mixed and spotted onto Mueller-Hinton agar and then incubated at 37°C overnight. The mixed cells were recovered and suspended into PBS buffer, plated onto LB agar after 10-fold serial dilution, and incubated at 37°C overnight. Transconjugants were selected on LB agar containing 2

303      $\mu\text{g/mL}$  of meropenem and 100  $\mu\text{g/mL}$  of sodium azide.

304



## Acknowledgements

We thank Meiko Takeshita for technical assistance and are grateful to the participating medical institution for providing the bacterial isolates and clinical information. This work was supported by Grants-in-Aid for the Research Program on Emerging and Re-emerging Infectious Diseases (JP18fk0108020, JP19fk0108061, JP19fk0108093, JP19fk0108052, and JP19fk0108049) and the Japan Initiative for Global Research Network on Infectious Diseases (J-GRID) (JP17fm0108023, JP18fm0108003, and JP19fm0108006) from the Japan Agency for Medical Research and Development (AMED). This work was also supported by the Cooperative Research Grant from Research Center on Tropical Disease, Institute of Tropical Medicine, Nagasaki University (2019-Ippan-20).

317 Conflicts of Interest

318 None to declare.

319

## Figure Legends

### Figure 1.

CRE isolates sequenced on Illumina systems. Red nodes, but not black nodes, show isolates subsequently sequenced with ONT MinION. Bar lengths represent the number of substitutions per site in the core genome. Minimum inhibitory concentrations (MICs) of meropenem (MEM) and imipenem (IPM) of isolates, years in which the bacteria were isolated, plasmid replicon types, and sizes of *bla*<sub>NDM</sub>-carrying plasmids are shown.

### Figure 2.

*bla*<sub>NDM-1</sub>-carrying plasmids in CRE isolates sequenced using ONT MinION and Illumina systems. Sets of plasmids from *P. mirabilis* MH13-009N and *M. morganii* MH16-367M, and from *E. coli* MH13-051M and *C. freundii* MH17-012N, are shown. (A) and (C) Linear comparison of *bla*<sub>NDM-1</sub>-carrying plasmid sequences. Sets of plasmids from *P. mirabilis* MH13-009N and *M. morganii* MH16-367M (A and B), and from *E. coli* MH13-051M and *C. freundii* MH17-012N (C and D), are shown. Red, yellow, green, blue, and gray arrows indicate *bla*<sub>NDM-1</sub>, other important AMR genes (ARG), type IV secretion system (T4SS)-associated genes involved in conjugation, mobile gene elements (MGE), and other genes, respectively.

### Figure 3.

(A) and (B) Linear comparison of plasmid sequences from Vietnam and other countries. *P. mirabilis* pMH13-009N\_1 and *Salmonella enterica* FDAARGOS\_70 plasmid unnamed1 (accession: CP026053) (A), and *C. freundii* pMH17-012N\_2, *E. coli* p103-2-4 (accession: CP034846), and *Salmonella enterica* serovar Enteritidis p12367A

(accession: CP041177) (B) are shown.

Figure 4.

Linear comparison of *bla*<sub>NDM-1</sub>-carrying plasmid sequences from Vietnam and other countries. *K. pneumoniae* pMH15-289M\_1, *K. pneumoniae* pMH16-398D\_1, *K. pneumoniae* pMH15-258M\_1, *K. pneumoniae* tig00000169\_pilon (accession: CP021952), and *E. coli* pK71-77-1-NDM (accession: CP040884) are shown.

Figure 5.

Linear comparison of *bla*<sub>NDM</sub>-carrying plasmid sequences from Vietnam and other countries. *K. pneumoniae* pMH15-208H\_1, *K. pneumoniae* pMH15-191M\_1, *K. pneumoniae* pMH13-055M\_1, *E. hormaechei* pNDM1\_045001 (accession: CP043383), and *K. pneumoniae* pSECR18-2374C (accession: CP041930) are shown.

## References

1. Tzouvelekis LS, Markogiannakis A, Psychogiou M, Tassios PT, Daikos GL. Carbapenemases in *Klebsiella pneumoniae* and other Enterobacteriaceae: an evolving crisis of global dimensions. Clin Microbiol Rev. 2012;25: 682–707.
2. Huang S, Dai W, Sun S, Zhang X, Zhang L. Prevalence of plasmid-mediated quinolone resistance and aminoglycoside resistance determinants among carbapenem non-susceptible *Enterobacter cloacae*. PLoS One. 2012;7: e47636.
3. Wu JJ, Ko WC, Tsai SH, Yan JJ. Prevalence of plasmid-mediated quinolone resistance determinants QnrA, QnrB, and QnrS among clinical isolates of *Enterobacter cloacae* in a Taiwanese hospital. Antimicrob Agents Chemother. 2007.
4. Chmelnitsky I, Navon-Venezia S, Strahilevitz J, Carmeli Y. Plasmid-mediated qnrB2 and carbapenemase gene blaKPC-2 carried on the same plasmid in carbapenem-resistant ciprofloxacin-susceptible *Enterobacter cloacae* isolates. Antimicrob Agents Chemother. 2008.
5. Poirel L, Dortet L, Bernabeu S, Nordmann P. Genetic features of blaNDM-1-positive Enterobacteriaceae. Antimicrob Agents Chemother. 2011;55: 5403–7.
6. Yamane K, Wachino JI, Suzuki S, Kimura K, Shibata N, Kato H, et al. New plasmid-mediated fluoroquinolone efflux pump, QepA, found in an *Escherichia coli* clinical isolate. Antimicrob Agents Chemother. 2007.
7. Deng Y, He L, Chen S, Zheng H, Zeng Z, Liu Y, et al. F33:A-B- and F2:A-B- plasmids mediate dissemination of rmtB-blaCTX-M-9 group genes and rmtB-qepA in Enterobacteriaceae isolates from pets in China. Antimicrob Agents

Chemother. 2011;55: 4926–9.

8. Kinh N Van, Wertheim HFL, Thwaite GE, Khue LN, Thai CH, Khoa NT, et al.

Developing an antimicrobial resistance reference laboratory and surveillance programme in Vietnam. The Lancet Global Health. 2017.

9. Wertheim HFL, Chandna A, Vu PD, Pham C Van, Nguyen PDT, Lam YM, et al.

Providing impetus, tools, and guidance to strengthen national capacity for antimicrobial stewardship in Viet Nam. PLoS Med. 2013;10: e1001429.

10. Vu TVD, Do TTN, Rydell U, Nilsson LE, Olson L, Larsson M, et al. Antimicrobial susceptibility testing and antibiotic consumption results from 16 hospitals in Viet Nam: The VINARES project 2012–2013. J Glob Antimicrob Resist. 2019;18: 269–278.

11. Monnet DL, Eemborg HD, Andersen SR, Schöller C, Sørensen TL, Bager F. Surveillance of antimicrobial resistance in Denmark. Eurosurveillance. 2000.

12. Sanchez G V., Master RN, Clark RB, Fyyaz M, Duvvuri P, Ekta G, et al. Klebsiella pneumoniae antimicrobial drug resistance, United States, 1998-2010. Emerg Infect Dis. 2013;19: 133–136.

13. Tran DM, Larsson M, Olson L, Hoang NTB, Le NK, Khu DTK, et al. High prevalence of colonisation with carbapenem-resistant Enterobacteriaceae among patients admitted to Vietnamese hospitals: Risk factors and burden of disease. J Infect. 2019;79: 115–122.

14. Tran HH, Ehsani S, Shibayama K, Matsui M, Suzuki S, Nguyen MB, et al. Common isolation of New Delhi metallo-beta-lactamase 1-producing Enterobacteriaceae in a large surgical hospital in Vietnam. Eur J Clin Microbiol Infect Dis. 2015;34: 1247–1254.

15. Conlan S, Thomas PJ, Deming C, Park M, Lau AF, Dekker JP, et al. Single-molecule sequencing to track plasmid diversity of hospital-associated carbapenemase-producing Enterobacteriaceae. *Sci Transl Med*. 2014;6:254ra126.
16. Lemon JK, Khil PP, Frank KM, Dekker JP. Rapid Nanopore Sequencing of Plasmids and Resistance Gene Detection in Clinical Isolates. Mellmann A, editor. *J Clin Microbiol*. 2017;55: 3530–3543.
17. Gorrie CL, Mirceta M, Wick RR, Judd LM, Wyres KL, Thomson NR, et al. Antimicrobial-Resistant *Klebsiella pneumoniae* Carriage and Infection in Specialized Geriatric Care Wards Linked to Acquisition in the Referring Hospital. *Clin Infect Dis*. 2018;67: 161–170.
18. Hoang TH, Wertheim H, Minh NB, Duong TN, Anh DD, Phuong TTL, et al. Carbapenem-Resistant *Escherichia coli* and *Klebsiella pneumoniae* Strains Containing New Delhi Metallo-Beta-Lactamase Isolated from Two Patients in Vietnam: Table 1. *J Clin Microbiol*. 2013;51: 373–374.
19. Berçot B, Poirel L, Nordmann P. Plasmid-mediated 16S rRNA methylases among extended-spectrum beta-lactamase-producing Enterobacteriaceae isolates. *Antimicrob Agents Chemother*. 2008;52: 4526–7.
20. Dolejska M, Villa L, Hasman H, Hansen L, Carattoli A. Characterization of IncN plasmids carrying blaCTX-M-1 and qnr genes in *Escherichia coli* and *Salmonella* from animals, the environment and humans. *J Antimicrob Chemother*. 2013;68: 333–339.
21. He S, Chandler M, Varani AM, Hickman AB, Dekker JP, Dyda F. Mechanisms of Evolution in High-Consequence Drug Resistance Plasmids. *MBio*. 2016;7:

e01987-16.

22. Rozwandowicz M, Brouwer MSM, Fischer J, Wagenaar JA, Gonzalez-Zorn B, Guerra B, et al. Plasmids carrying antimicrobial resistance genes in Enterobacteriaceae. *J Antimicrob Chemother.* 2018;73: 1121–1137.
23. Compain F, Frangeul L, Drieux L, Verdet C, Brisse S, Arlet G, et al. Complete Nucleotide Sequence of Two Multidrug-Resistant IncR Plasmids from *Klebsiella pneumoniae*. *Antimicrob Agents Chemother.* 2014;58: 4207–4210.
24. He L, Partridge SR, Yang X, Hou J, Deng Y, Yao Q, et al. Complete nucleotide sequence of pHN7A8, an F33:A-B-type epidemic plasmid carrying blaCTX-M-65, fosA3 and rmtB from China. *J Antimicrob Chemother.* 2013;68: 46–50.
25. Garza-Ramos U, Barrios H, Hernandez-Vargas MJ, Rojas-Moreno T, Reyna-Flores F, Tinoco P, et al. Transfer of quinolone resistance gene qnrA1 to *Escherichia coli* through a 50 kb conjugative plasmid resulting from the splitting of a 300 kb plasmid. *J Antimicrob Chemother.* 2012;67: 1627–1634.
26. Bowers JR, Kitchel B, Driebe EM, MacCannell DR, Roe C, Lemmer D, et al. Genomic Analysis of the Emergence and Rapid Global Dissemination of the Clonal Group 258 *Klebsiella pneumoniae* Pandemic. Bengoechea JA, editor. *PLoS One.* 2015;10: e0133727.
27. Runcharoen C, Moradigaravand D, Blane B, Paksanont S, Thammachote J, Anun S, et al. Whole genome sequencing reveals high-resolution epidemiological links between clinical and environmental *Klebsiella pneumoniae*. *Genome Med.* 2017;9: 6.
28. Mathers AJ, Peirano G, Pitout JDD. The role of epidemic resistance plasmids and international high-risk clones in the spread of multidrug-resistant



454 Enterobacteriaceae. Clin Microbiol Rev. 2015;28: 565–91.

455 29. Poirel L, Walsh TR, Cuvillier V, Nordmann P. Multiplex PCR for detection of  
456 acquired carbapenemase genes. Diagn Microbiol Infect Dis. 2011;70: 119–123.

457 30. Koren S, Walenz BP, Berlin K, Miller JR, Bergman NH, Phillippy AM. Canu:  
458 scalable and accurate long-read assembly via adaptive k-mer weighting and  
459 repeat separation. Genome Res. 2017;27: 722–736.

460 31. Li H. Minimap and miniasm: Fast mapping and de novo assembly for noisy long  
461 sequences. Bioinformatics. 2016;32: 2103–2110.

462 32. Bi D, Liu L, Tai C, Deng Z, Rajakumar K, Ou HY. SecReT4: A web-based  
463 bacterial type IV secretion system resource. Nucleic Acids Res. 2013;41.

464

Fig. 1

bioRxiv preprint doi: <https://doi.org/10.1101/2020.03.18.996710>; this version posted March 18, 2020. The copyright holder for this preprint (which was not certified by peer review) is the author/funder, who has granted bioRxiv a license to display the preprint in perpetuity. It is made available under aCC-BY 4.0 International license.

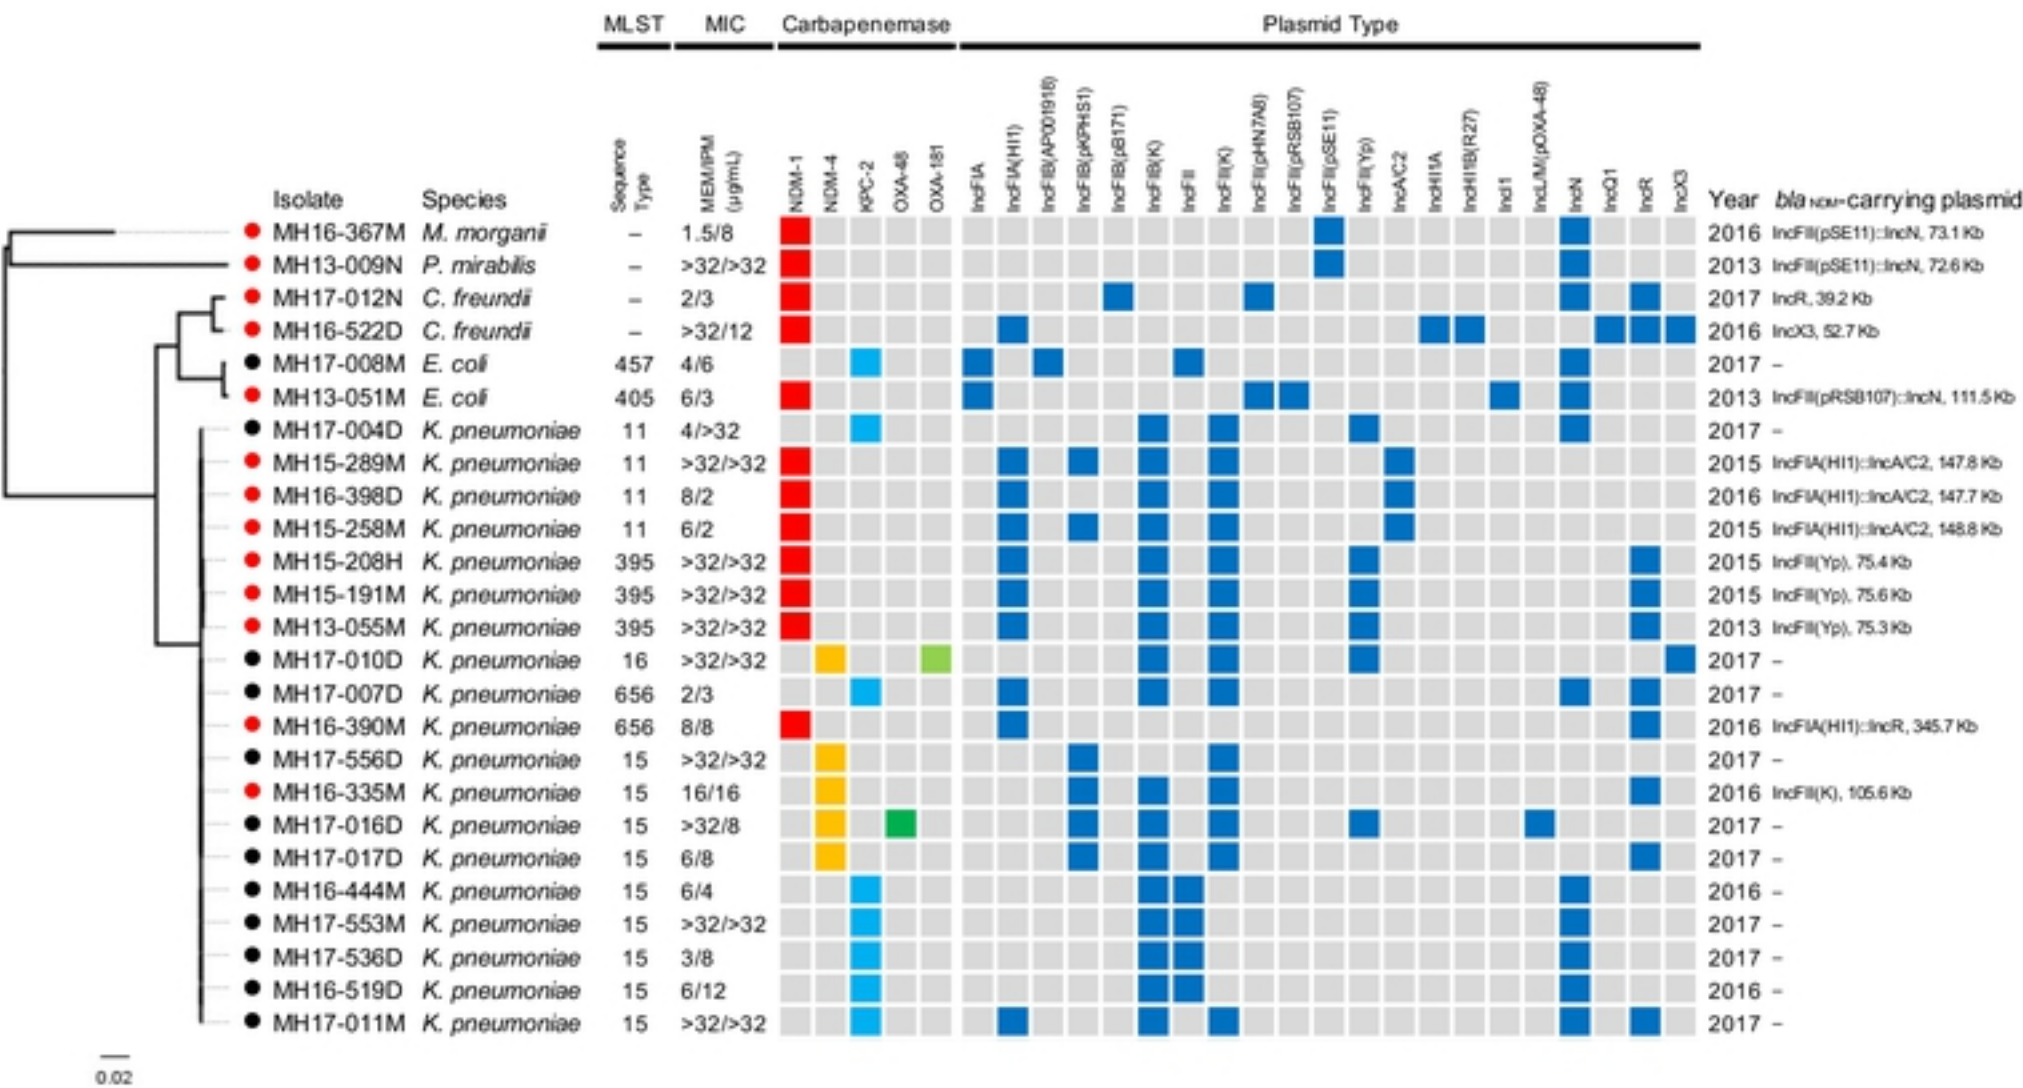

Fig. 2

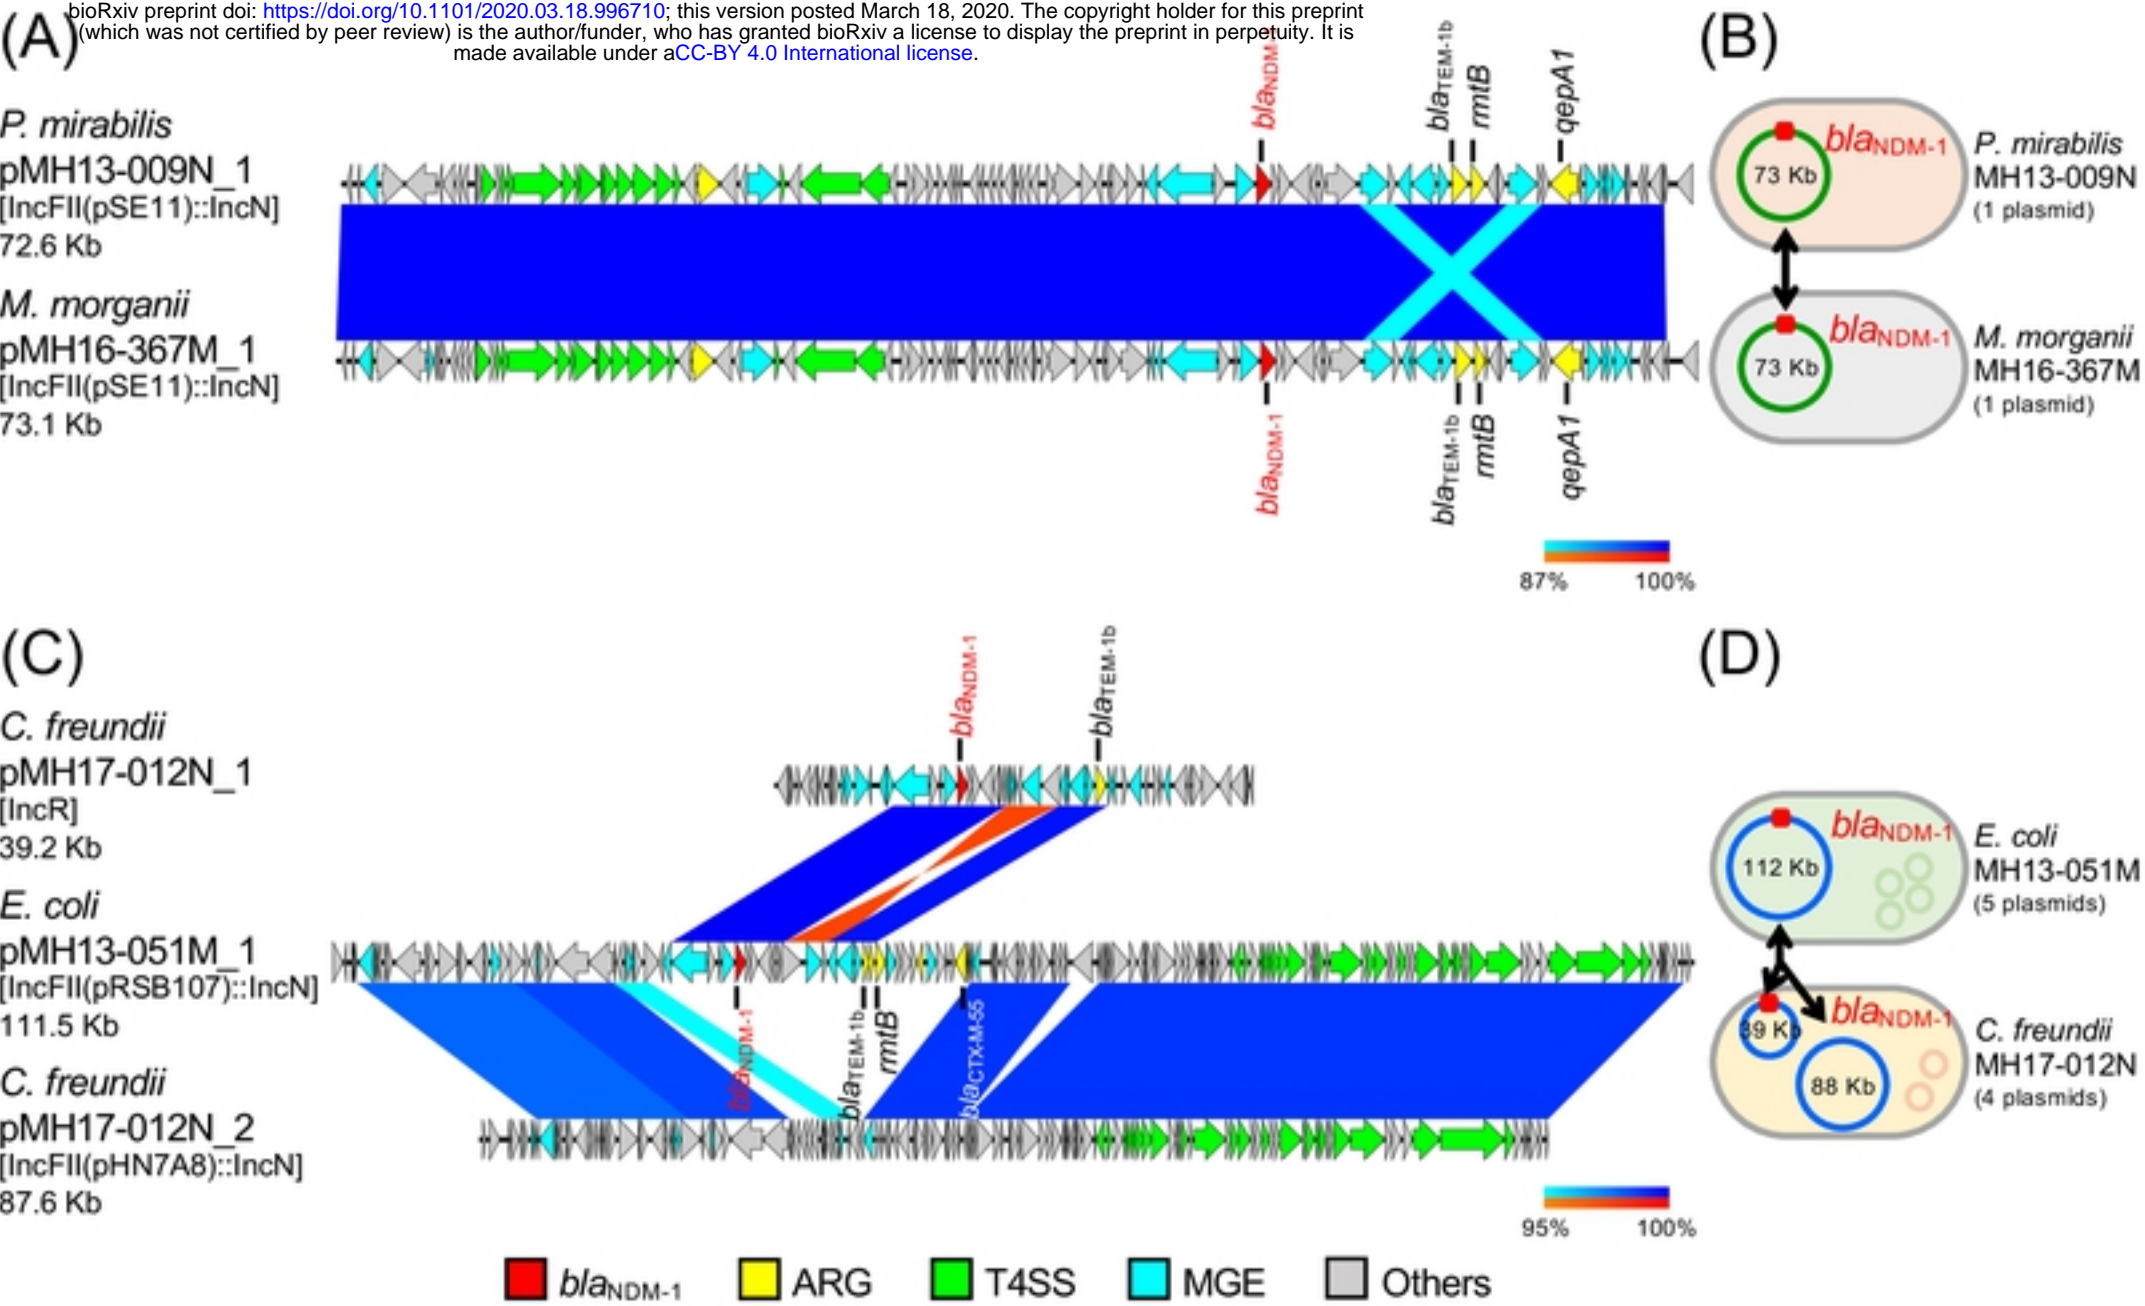

Fig. 3

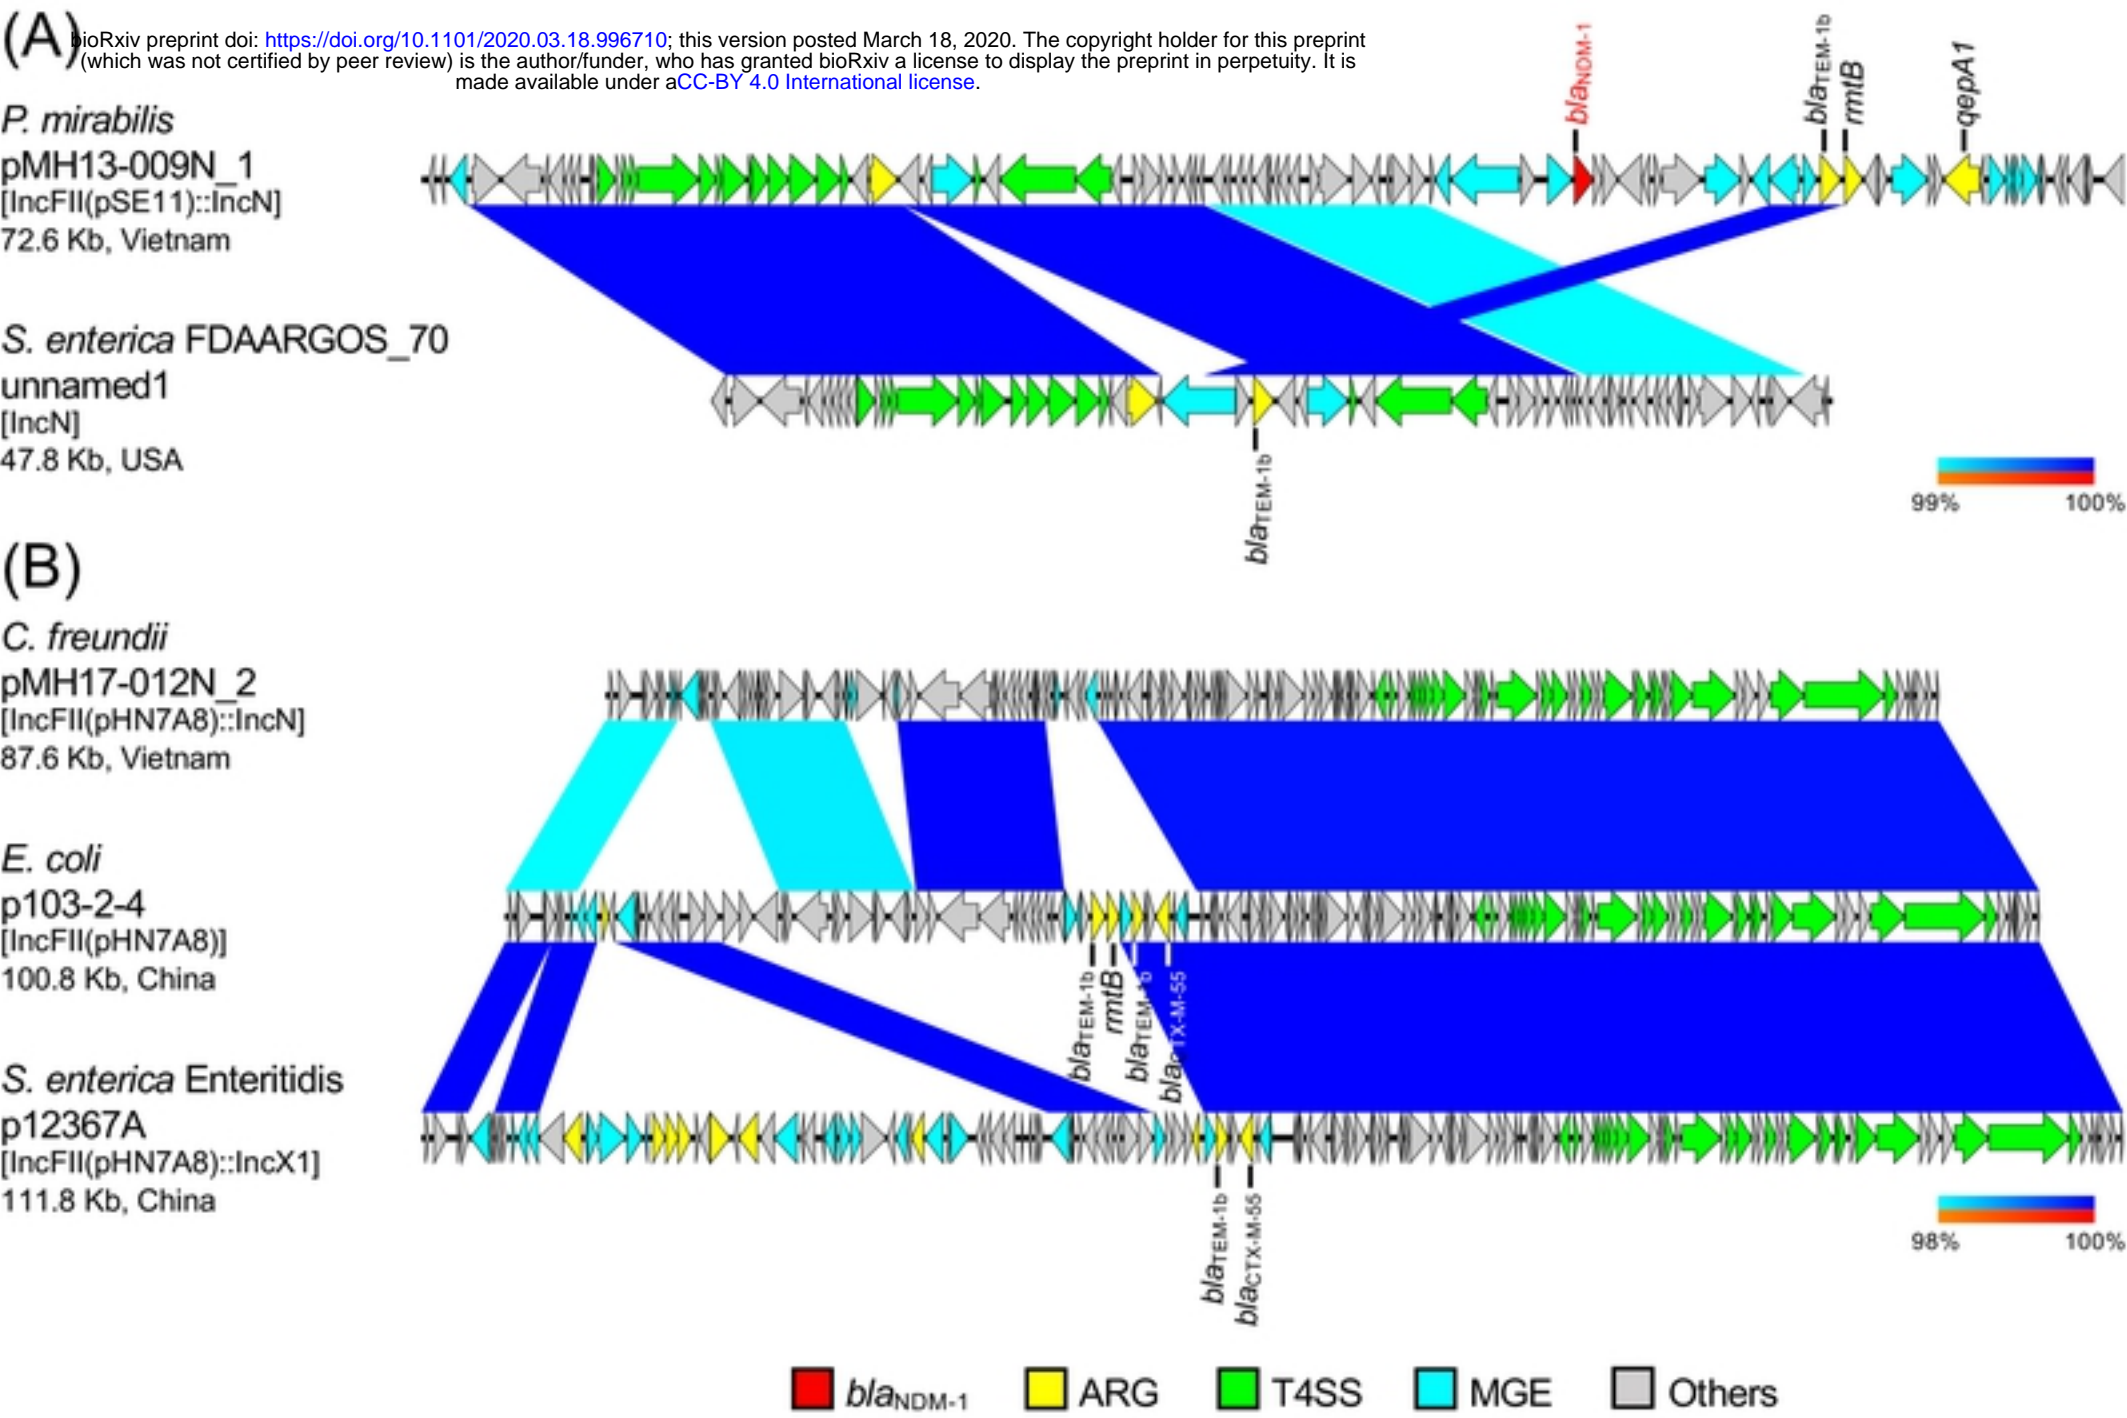



Fig. 4

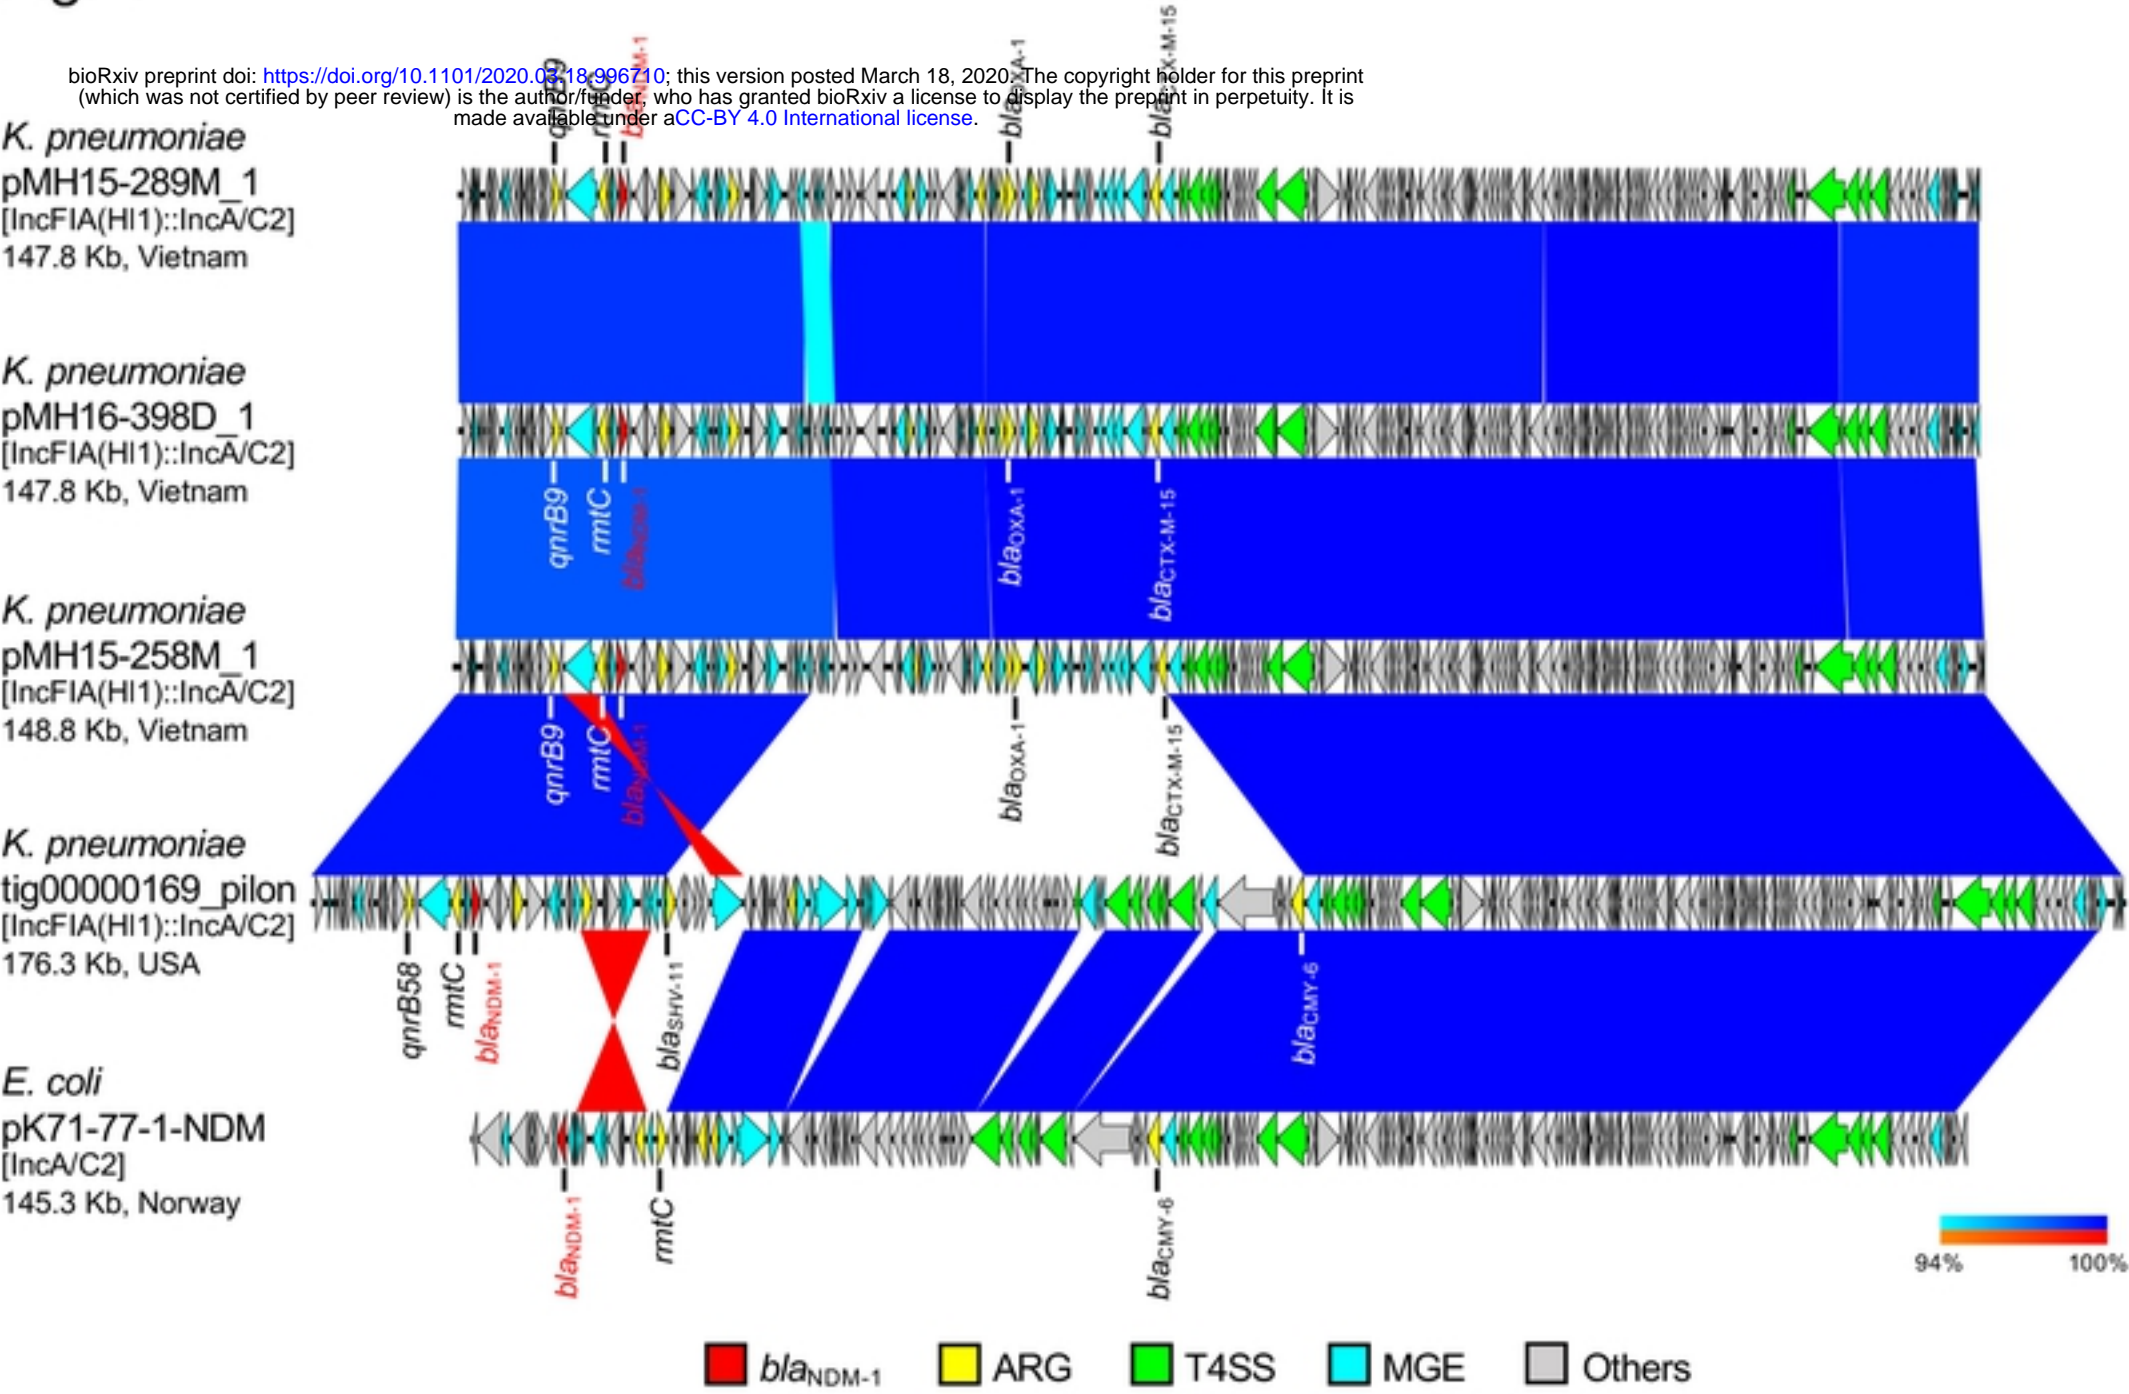

Fig. 5

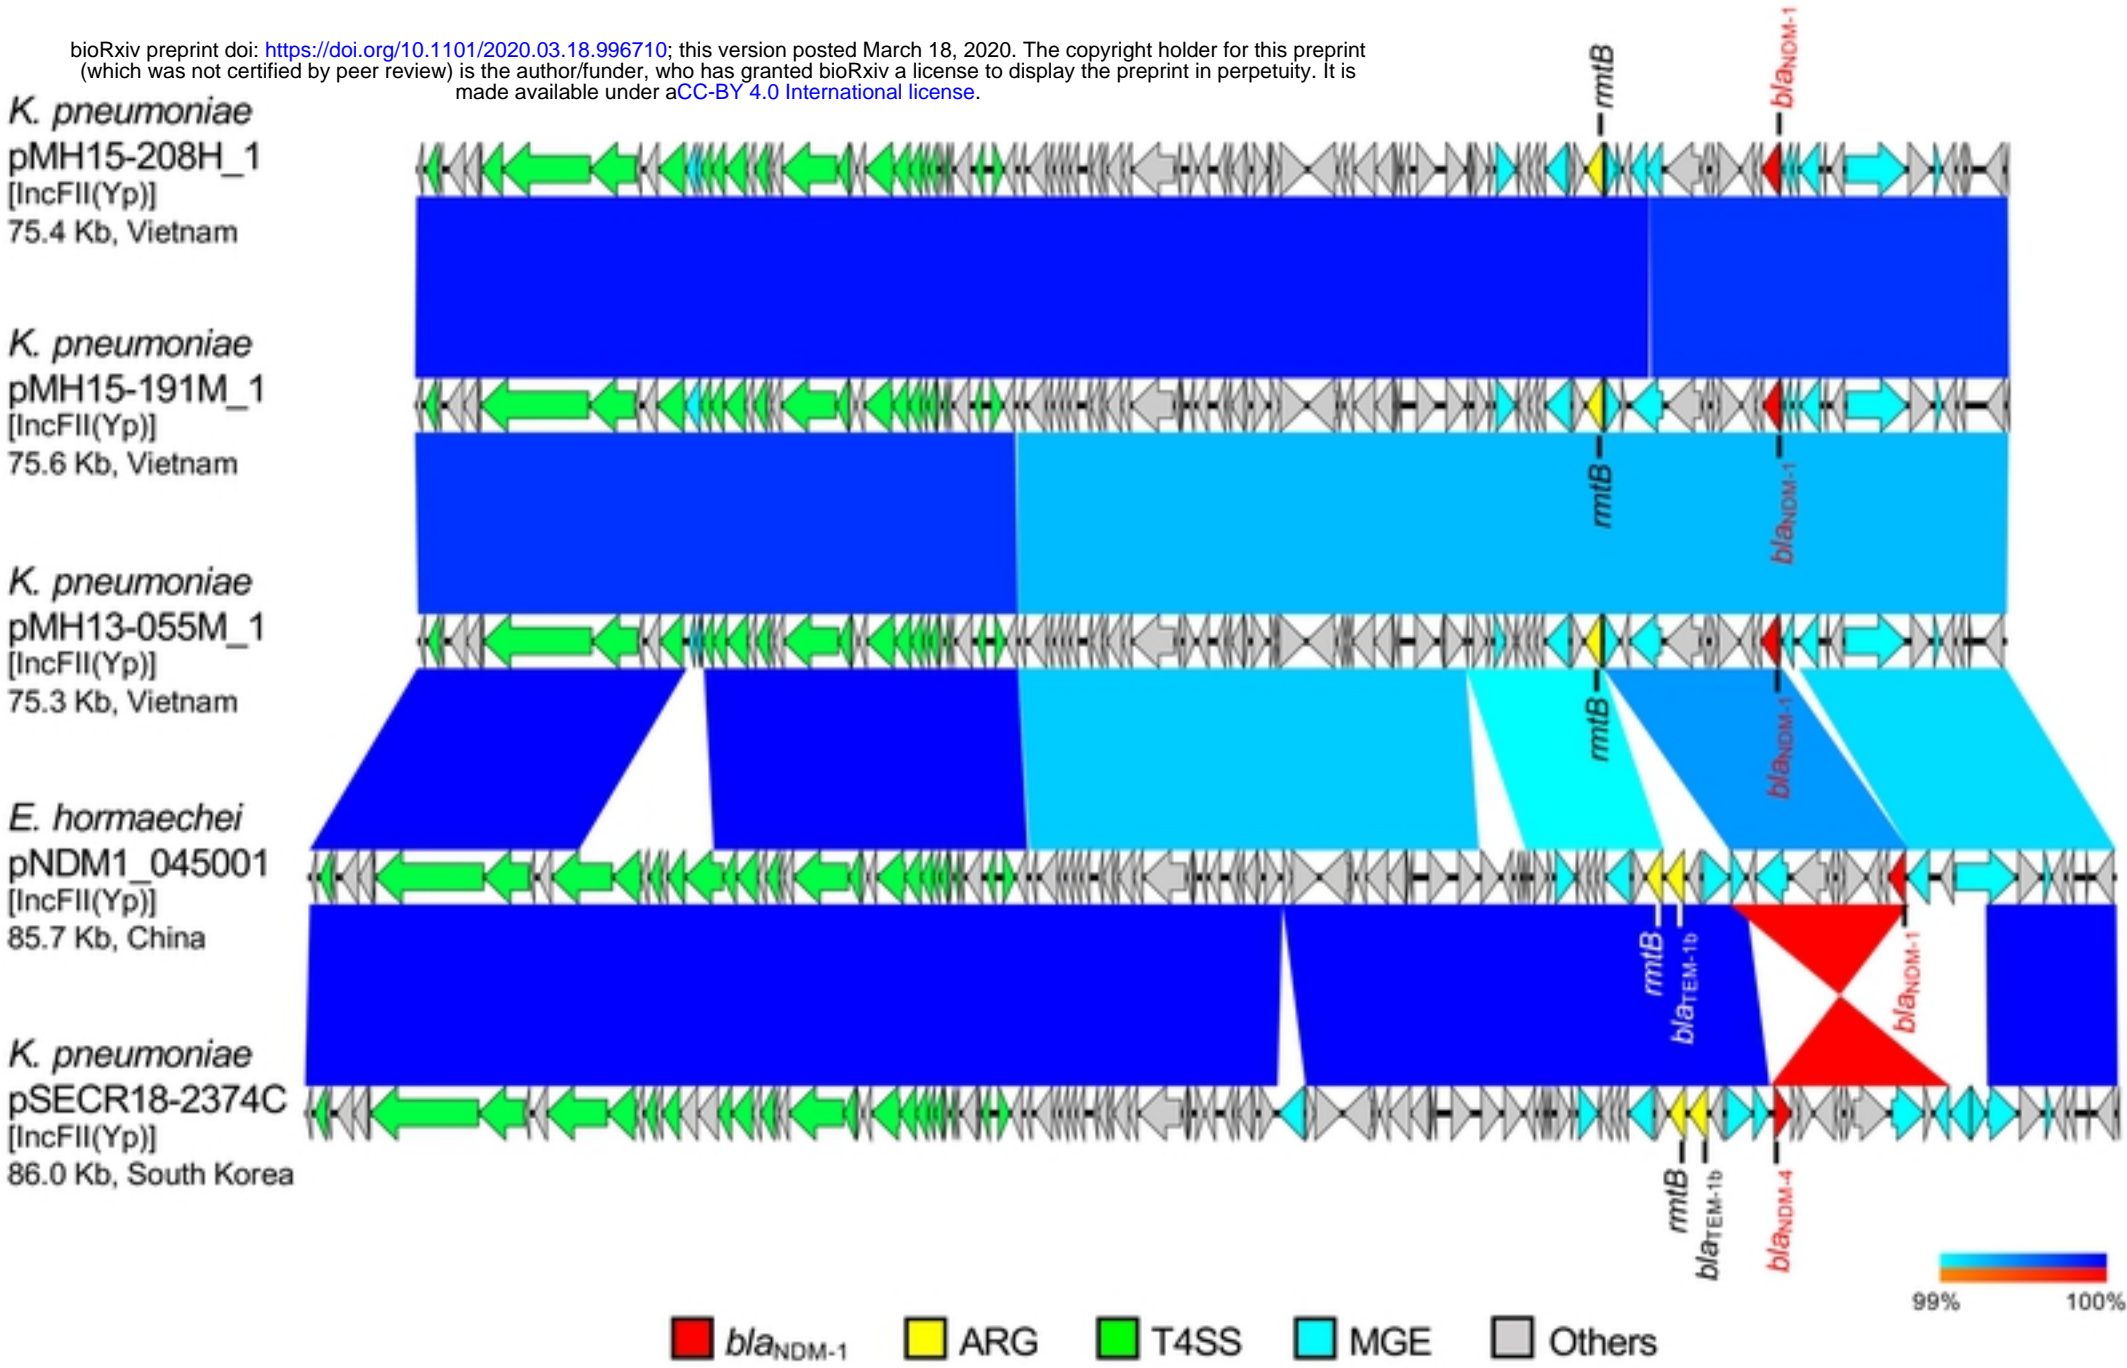

Source: https://www.biorxiv.org/content/biorxiv/early/2020/03/18/2020.03.18.996710.full.pdf
